# Supplementary material for: Bisphenol A Removal through Low-Cost Kaolin-Based Ag@TiO2 Photocatalytic Hollow Fiber Membrane from the Liquid Media under Visible Light Irradiation
Source: Hindawi journal article supplement (doi:10.1155/2020/3541797), 2020-06-22
Supplement: f1 [file 3541797.f1.pdf]

---

## Supplementary Information for

# Bisphenol A removal through low-cost kaolin-based Ag@TiO<sub>2</sub> photocatalyst ceramic hollow fiber membrane from the liquid media under visible light irradiation

Usman Shareef<sup>a,b</sup>, Muhammad Waqas<sup>a</sup>

*<sup>a</sup>Shanghai Key Laboratory of Multiphase Materials Chemical Engineering, Membrane Science and Engineering R&D Lab, Chemical Engineering Research Center, School of Chemical Engineering, East China University of Science and Technology, 130 Meilong Road, 200237, Shanghai, China*

*<sup>b</sup>Advanced Membrane Technology Research Center (AMTEC), School of Chemical and Energy Engineering, Universiti Teknologi Malaysia, 81310 Skudai, Johor, Malaysia.*

Corresponding author: Usman Shareef

Email: [Y10190182@mail.ecust.edu.cn](mailto:Y10190182@mail.ecust.edu.cn)

The supplementary information has five figures and five tables.

## Graphical Abstract

The Ag-doped TiO<sub>2</sub> hollow fiber ceramic membrane (Ag@TiCHF) was fabricated through dip coating method followed by synthesis of Ag@TiO<sub>2</sub> photocatalyst for the efficient removal of bisphenol A (BPA). The photocatalytic BPA removal efficiency of acquitted membrane (Ag@TiCHF) and Ag@TiO<sub>2</sub> photocatalyst was 90.51% and 93.22 %, respectively within 180 min under visible light irradiation.

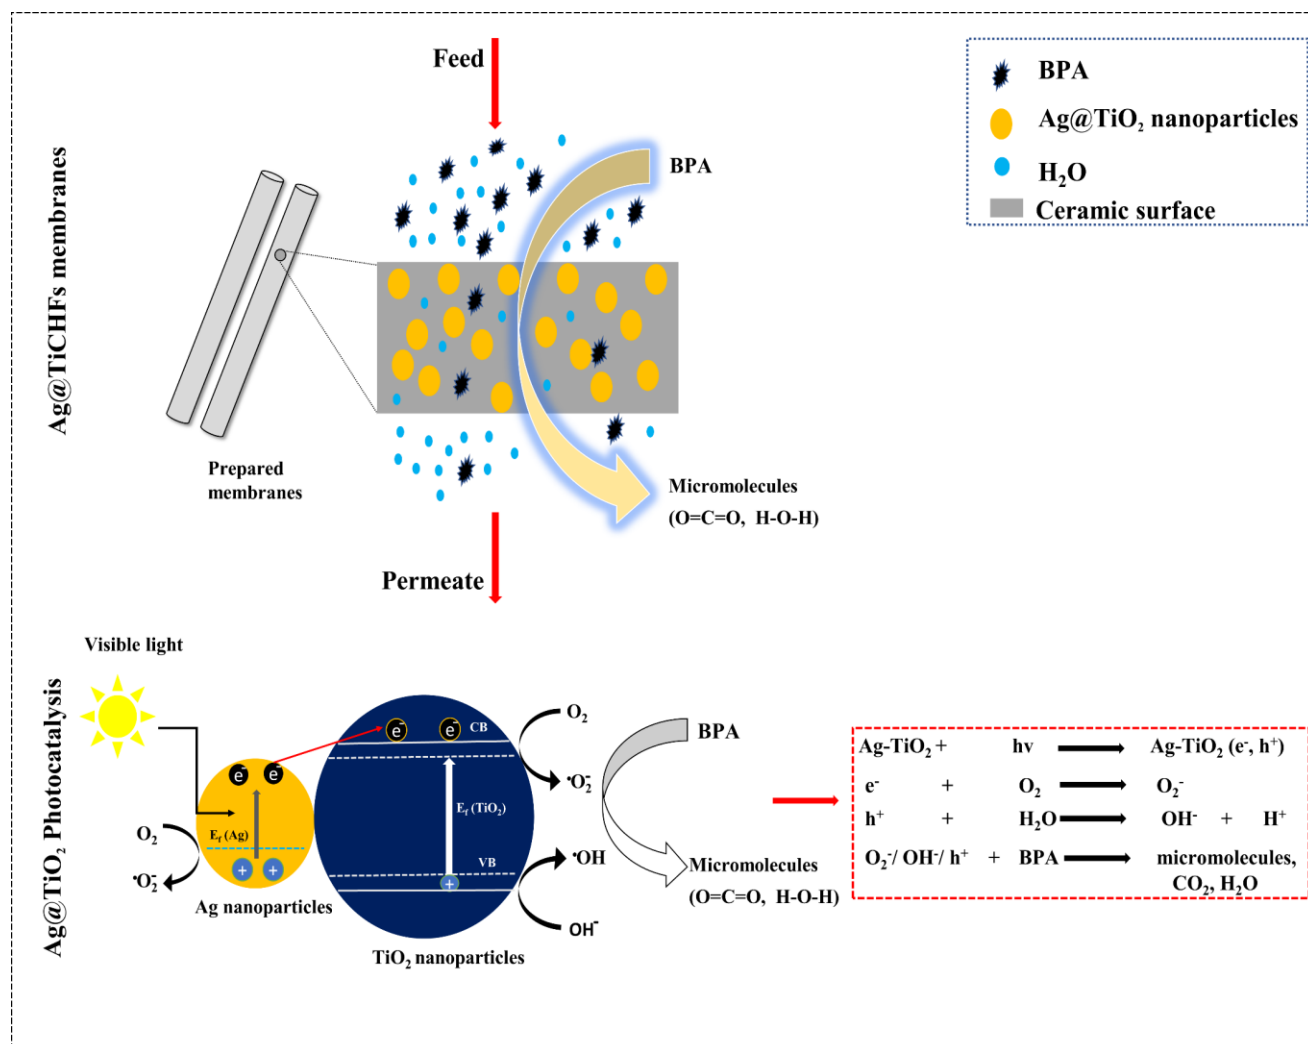

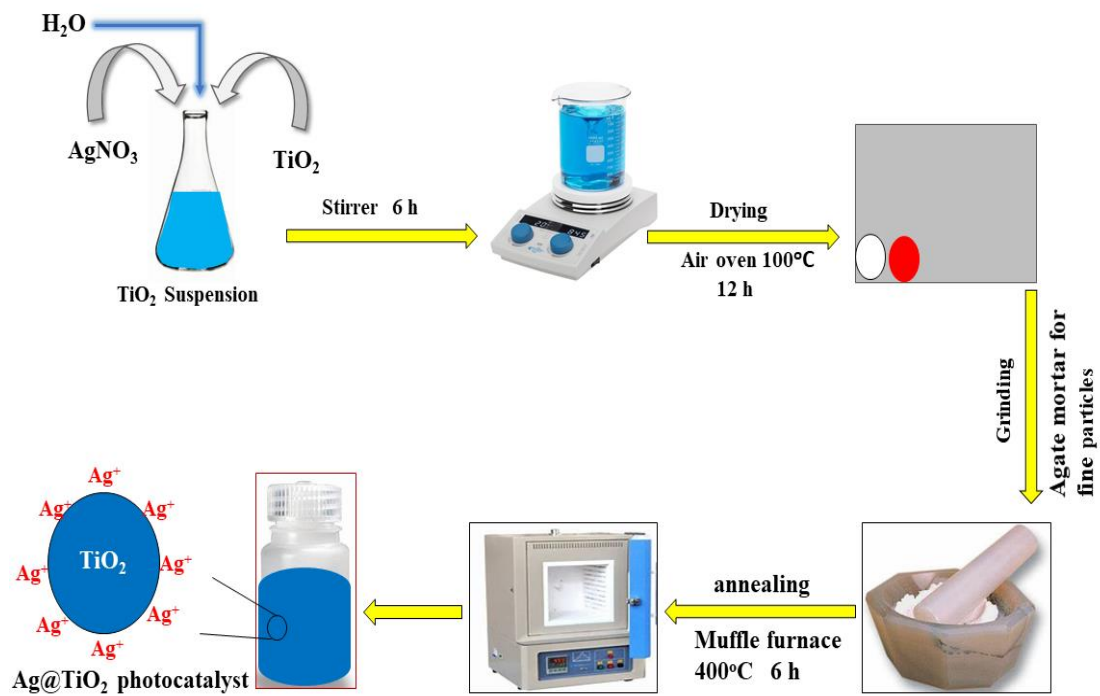

**Fig. S1** Illustration of Ag@TiO<sub>2</sub> nanoparticles

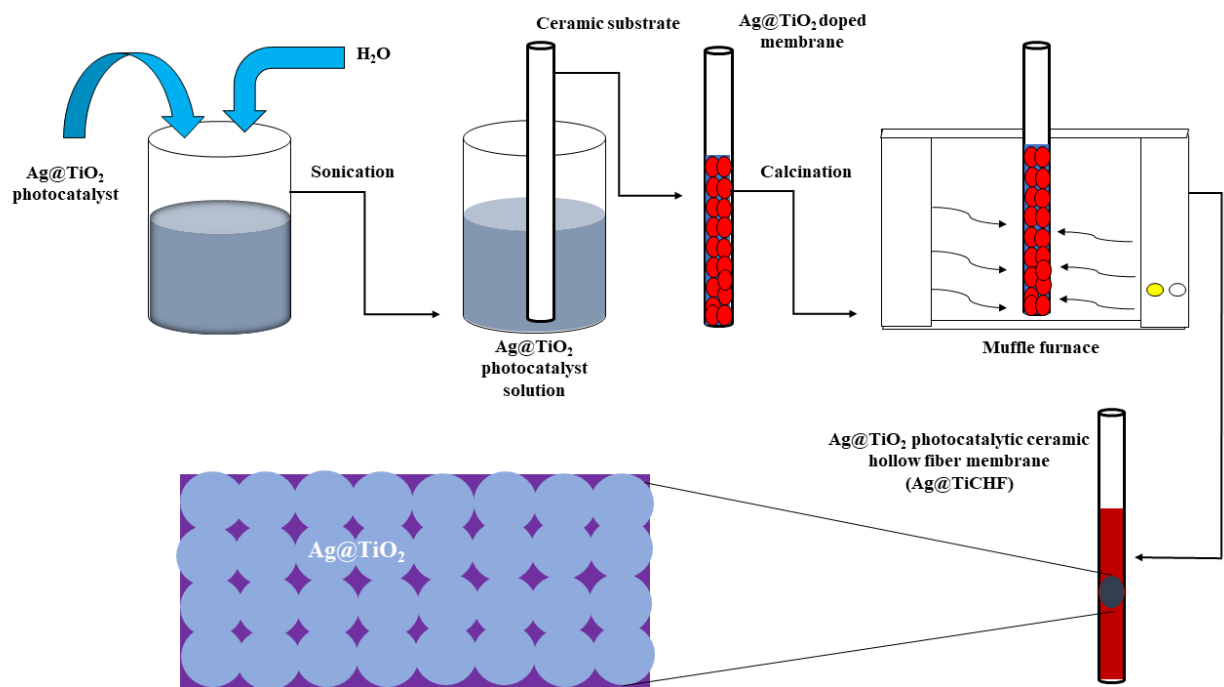

**Fig. S2** Modification of ceramic hollow fiber membrane

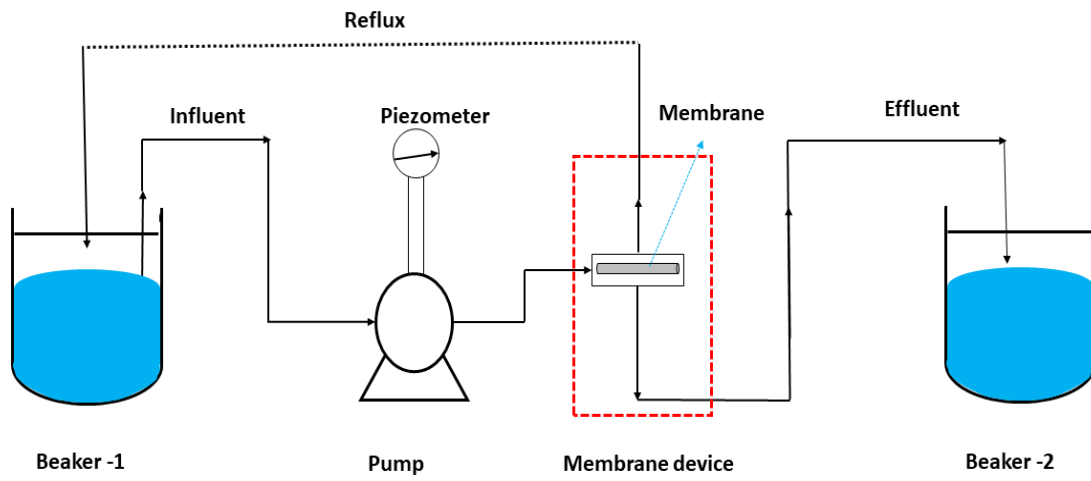

**Fig. S3** Pure water flux calculation of membrane device

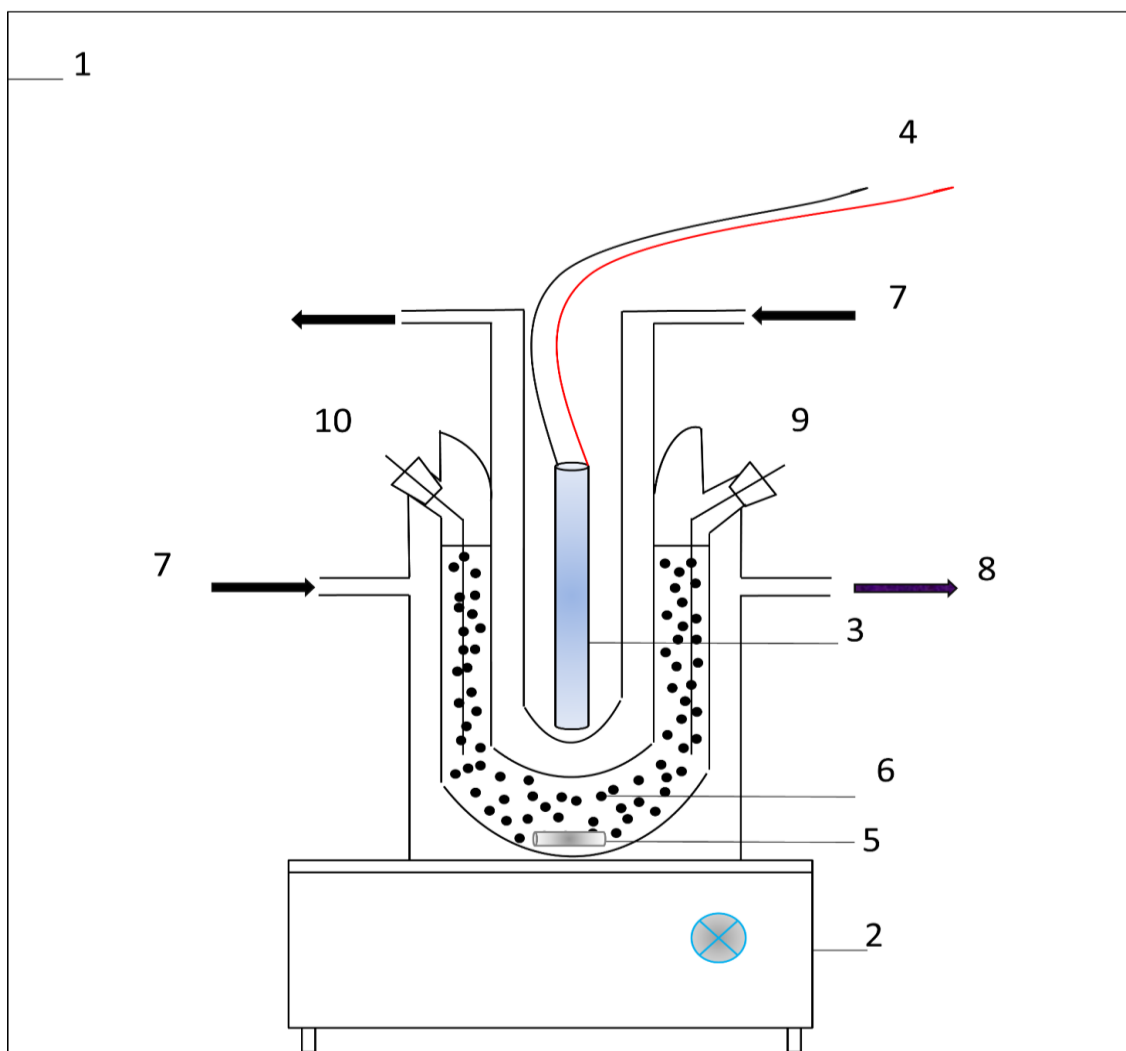

**Fig. S4 Photocatalytic reactor**

(1. Metal shield; 2. Magnetic stirrer; 3. Xenon lamp; 4. Electrical source; 5. Rotor;  
6. Solution; 7. Cooling water in; 8. Circulating water out; 9. Gas in; 10. Sampling port.)

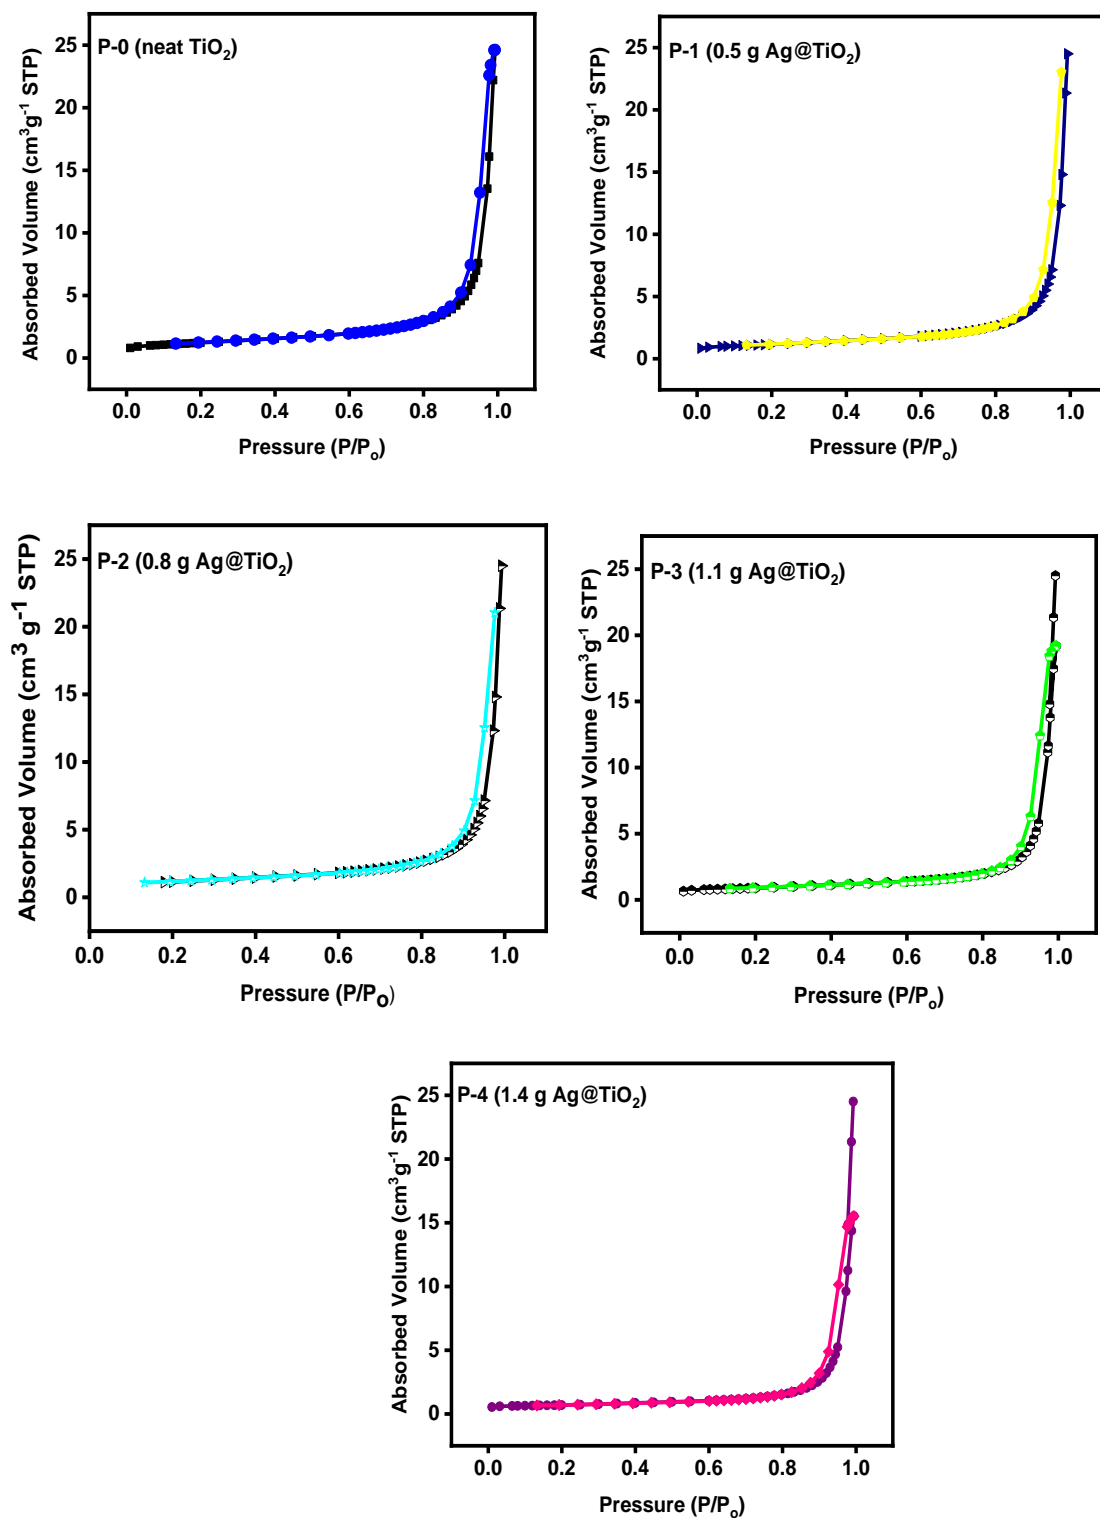

Fig. S5 BET graphs of Ag@TiO<sub>2</sub> nanoparticles.

---

**Table S1** Composition for the preparation of Ag@TiO<sub>2</sub> nanoparticles

| Sample | TiO <sub>2</sub><br>(g) | AgNO <sub>3</sub><br>(g) | H <sub>2</sub> O<br>(ml) | Mole Ratio<br>TiO <sub>2</sub> : Ag |
|--------|-------------------------|--------------------------|--------------------------|-------------------------------------|
| P-0    | 3                       | 0.0                      | 100                      |                                     |
| P-1    | 3                       | 0.5                      | 100                      | 1:0.08                              |
| P-2    | 3                       | 0.8                      | 100                      | 1:0.12                              |
| P-3    | 3                       | 1.1                      | 100                      | 1:0.17                              |
| P-4    | 3                       | 1.4                      | 100                      | 1:0.22                              |



---

**Table S2** The spinning parameters and casting solution compositions

| <b>Dope Composition</b>               | <b>Wt. (%)</b> |
|---------------------------------------|----------------|
| Kaolin                                | 50             |
| PESf                                  | 6.5            |
| NMP                                   | 42.1           |
| Aracel                                | 1              |
| <b>Spinning parameters</b>            |                |
| Air gap                               | 10 cm          |
| Extrusion rate                        | 9.0 mL/min     |
| Bore fluid rate                       | 10.0 mL/min    |
| Casting solution temperature          | 25°C           |
| External coagulation bath temperature | 25°C           |
| N <sub>2</sub> pressure               | 21-30 psi      |

---

---

**Table S3** Elemental composition of Ag in TiO<sub>2</sub> catalyst.

| Sample                            | Ti<br>(wt %) | O<br>(wt %) | Ag<br>(wt %) |
|-----------------------------------|--------------|-------------|--------------|
| P-0 (neat TiO <sub>2</sub> )      | 65.2         | 39.5        | 0.0          |
| P-1 (Ag@TiO <sub>2</sub> , 0.5 g) | 60.9         | 35.6        | 7.0          |
| P-2 (Ag@TiO <sub>2</sub> , 0.8 g) | 58.9         | 32.7        | 8.1          |
| P-3 (Ag@TiO <sub>2</sub> , 1.1 g) | 77.8         | 15.8        | 12.1         |
| P-4 (Ag@TiO <sub>2</sub> , 1.4 g) | 60.4         | 22.2        | 17.3         |

---

**Table S4** The grain size, surface area, and band gap of Ag@TiO<sub>2</sub> photocatalysts

| Sample                           | Grain size (nm) | Dislocation density (nm) <sup>-2</sup> | Surface area (m <sup>2</sup> /g) | Band gap (eV) |
|----------------------------------|-----------------|----------------------------------------|----------------------------------|---------------|
| P-0 (neat TiO <sub>2</sub> )     | 28.81           | 0.0021                                 | 42.854                           | 3.02          |
| P-1 (0.5 g Ag@TiO <sub>2</sub> ) | 42.12           | 0.0006                                 | 40.464                           | 3.00          |
| P-2 (0.8 g Ag@TiO <sub>2</sub> ) | 46.72           | 0.0007                                 | 37.526                           | 2.97          |
| P-3 (1.1 g Ag@TiO <sub>2</sub> ) | 49.45           | 0.0008                                 | 31.747                           | 2.92          |
| P-4 (1.4 g Ag@TiO <sub>2</sub> ) | 50.22           | 0.0007                                 | 25.639                           | 2.80          |

---

**Table S5** Reduction in the TOC value (%) of BPA solution using Ag/TiO<sub>2</sub> photocatalysts.

| Sample                           | Reduction in the TOC value (%) |
|----------------------------------|--------------------------------|
| P-1 (0.5 g Ag@TiO <sub>2</sub> ) | 67                             |
| P-2 (0.8 g Ag@TiO <sub>2</sub> ) | 52                             |
| P-3 (1.1 g Ag@TiO <sub>2</sub> ) | 86                             |
| P-4 (1.4 g Ag@TiO <sub>2</sub> ) | 78                             |
